# Supplementary material for: In situ IR spectral identification of NH4H2PO4structural evolution during crystallization in water–ethanol mixed solvent
Source: Royal Society of Chemistry journal article supplement (doi:10.1039/c5ce00196j), 2015-01-01
Supplement: c5ce00196j1.pdf [file c5ce00196j1.pdf]

## **Supporting Information**

### **In situ IR spectral identification of $\text{NH}_4\text{H}_2\text{PO}_4$ structural evolution during crystallization in water–ethanol mixed solvent**

Congting Sun and Dongfeng Xue\*

State Key Laboratory of Rare Earth Resource Utilization, Changchun Institute of Applied Chemistry,

Chinese Academy of Sciences, Changchun 130022, China

\*Corresponding author. E-mail: [dongfeng@ciac.ac.cn](mailto:dongfeng@ciac.ac.cn)

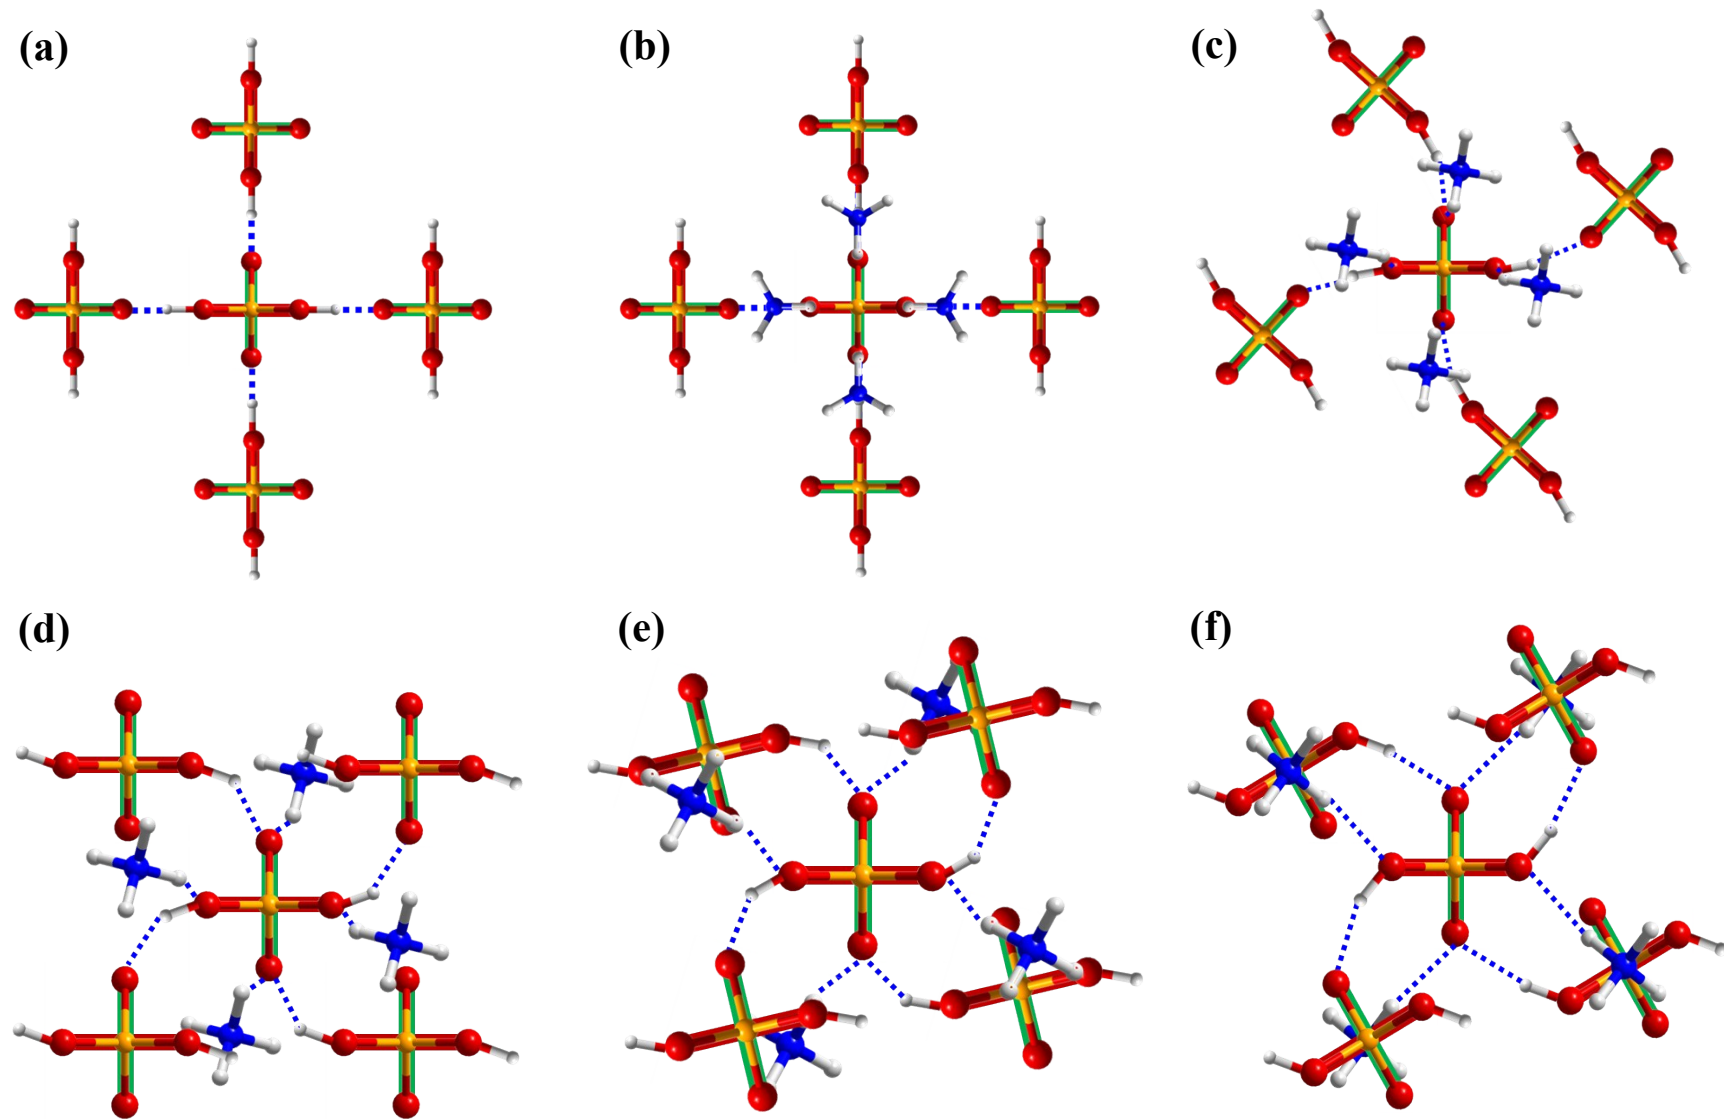

**Figure S1** Molecule motion from  $(\text{H}_2\text{PO}_4^-)_n$  framework (a) to amorphous precursor phase  $\text{NH}_4\text{H}_2\text{PO}_4$  (b–e) and crystalline state  $\text{NH}_4\text{H}_2\text{PO}_4$  (f).

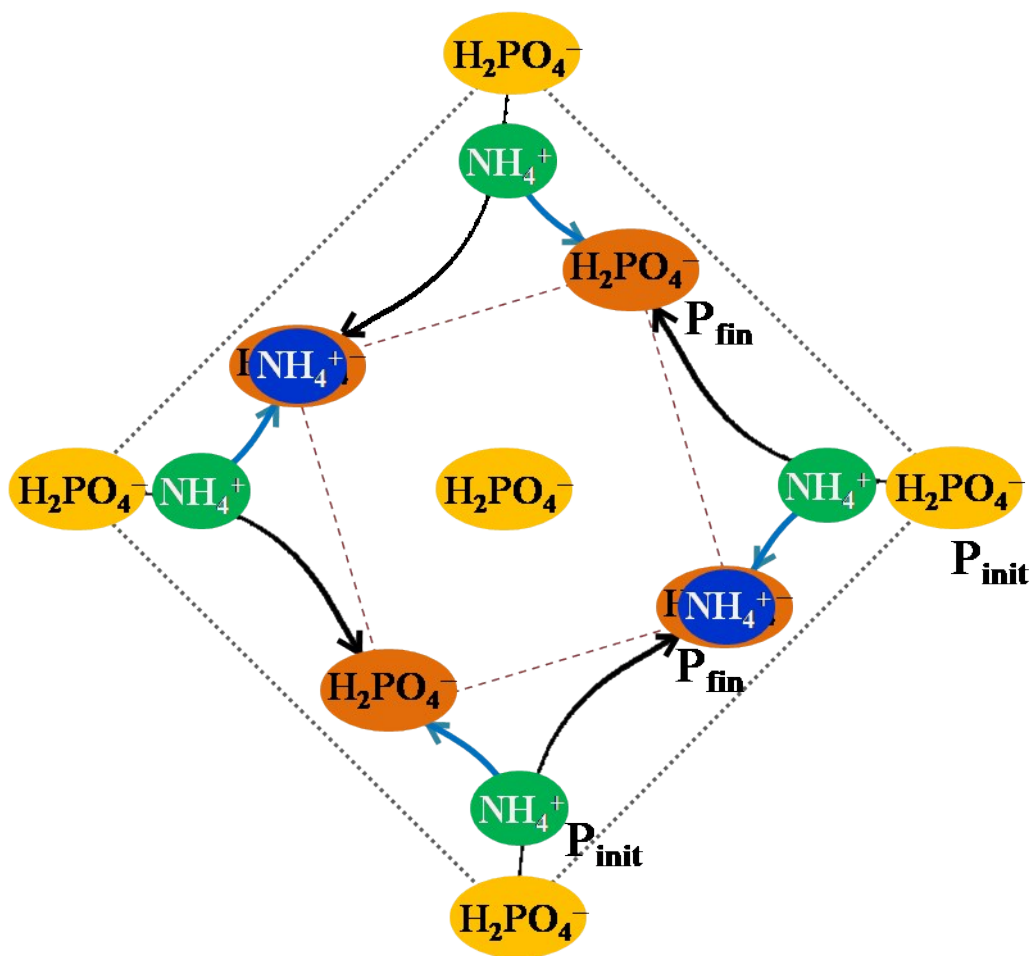

**Figure S2** Motion tracks of  $\text{NH}_4^+$  and  $\text{H}_2\text{PO}_4^-$  groups in  $\text{NH}_4\text{H}_2\text{PO}_4$  molecule in the transition from amorphous precursor phase to crystalline state.  $\text{H}_2\text{PO}_4^-$  groups move along the black line in an anticlockwise direction surrounding the center  $\text{H}_2\text{PO}_4^-$  group with  $60.26^\circ$ .  $\text{NH}_4^+$  groups move along the blue line in a clockwise direction surrounding the center  $\text{H}_2\text{PO}_4^-$  group with  $29.74^\circ$ .

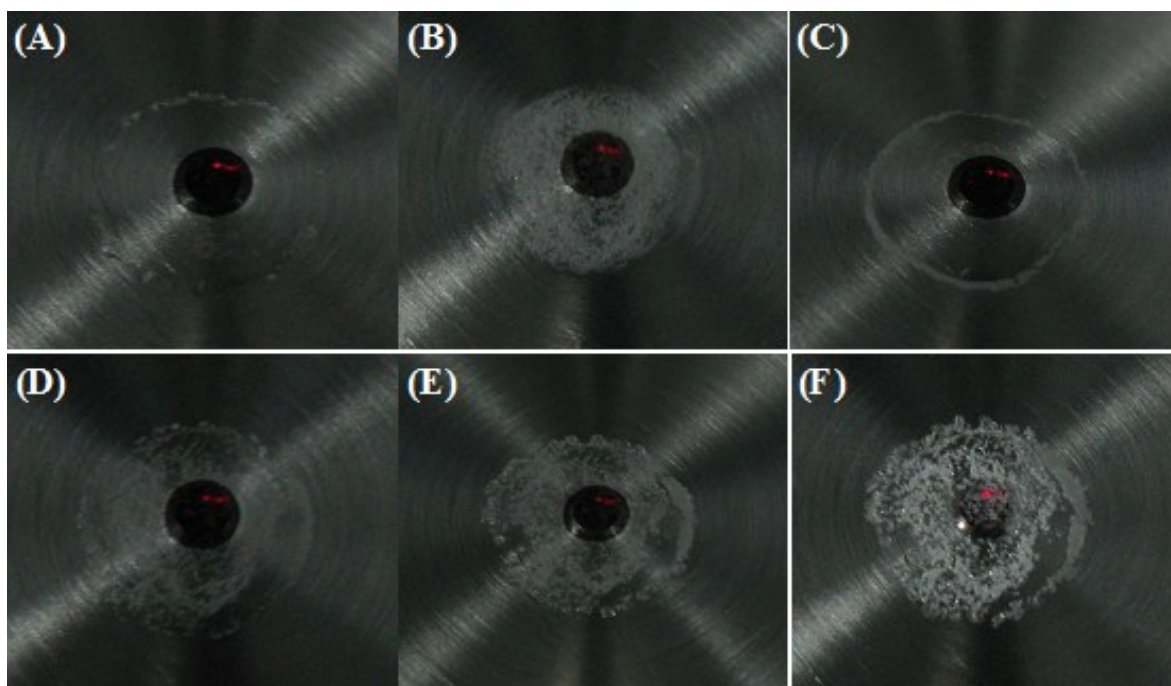

**Figure S3** Photographs of  $\text{NH}_4\text{H}_2\text{PO}_4$  aqueous crystallization system in IR measurements. (A) 5  $\mu\text{L}$   $\text{NH}_4\text{H}_2\text{PO}_4$  aqueous solution with the concentration of 1.17 mol/L (unsaturated solution) added to diamond wafer. (B–F)  $\text{NH}_4\text{H}_2\text{PO}_4$ – $\text{H}_2\text{O}$ –ethanol crystallization process with  $V(\text{H}_2\text{O}) : V(\text{ethanol}) = 1 : 1$ .

Table S1 The volume of H<sub>2</sub>O and mole mass of NH<sub>4</sub>H<sub>2</sub>PO<sub>4</sub> in 1 mL NH<sub>4</sub>H<sub>2</sub>PO<sub>4</sub> aqueous solution

| Concentration<br>(mol/L) | Solution volume<br>(mL) | NH <sub>4</sub> H <sub>2</sub> PO <sub>4</sub> mole mass<br>(mol) | Volume of H <sub>2</sub> O<br>(mL) |
|--------------------------|-------------------------|-------------------------------------------------------------------|------------------------------------|
| 1.17                     | 1                       | 1.17×10 <sup>3</sup>                                              | 0.943                              |
| 1.86                     | 1                       | 1.86×10 <sup>3</sup>                                              | 0.926                              |
| 2.33                     | 1                       | 2.33×10 <sup>3</sup>                                              | 0.893                              |
